# Supplementary material
Source: Springer Nature journal article supplement (https://www.springermedizin.de/resource/supplementary/12913_2013_3079_MOESM5_ESM.pdf/9532376)

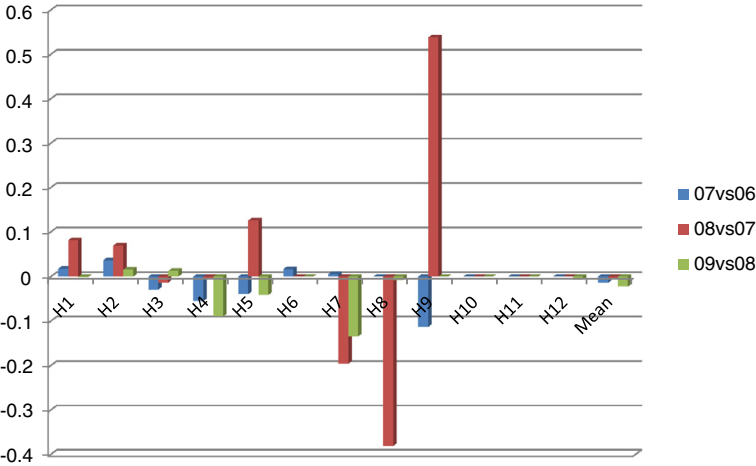

Supplement: MOESM5 [file 9532376]
